# Supplementary material for: MicroRNA-640 promotes cell proliferation and adhesion in glioblastoma by targeting Slit guidance ligand 1
Source: PubMed Central journal article supplement — Oncol Lett. 2020 Dec 31;21(2):161. doi: 10.3892/ol.2020.12422 (PMC7798089; doi:10.3892/ol.2020.12422), 2020-12-31
Supplement: Supplementary_Data.pdf [file Supplementary_Data.pdf]

Figure S1. Assessment of transfection efficiency in A172 and U251 cells. (A) Transfection efficiency of miR-640 mimic or inhibitor in A172 and U251 cells was assessed via RT-qPCR analysis. (B) Transfection efficiency of SLIT1 overexpression in A172 and U251 cells was assessed via RT-qPCR analysis. \*\* $P < 0.001$ . Data are presented as the mean  $\pm$  standard deviation ( $n=3$ ). miR, microRNA; RT-qPCR, reverse transcription-quantitative PCR; SLIT1, Slit guidance ligand 1; NC, negative control; OE, overexpression vector.

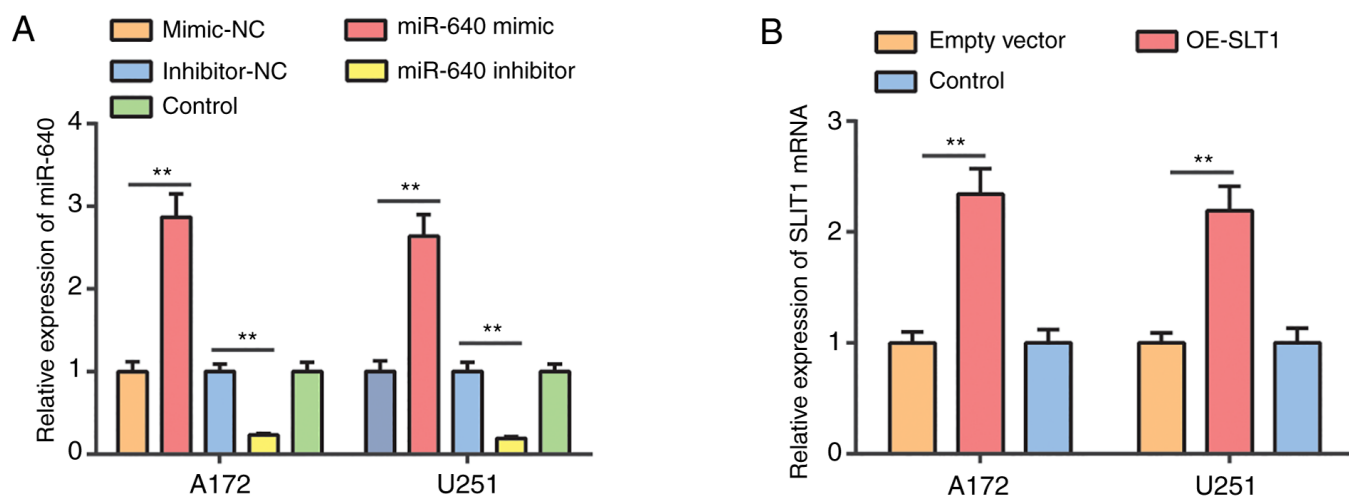

Table SI. Sequences used for cell transfection.

| Name                    | Sequence (5'-3')         |
|-------------------------|--------------------------|
| OE-SLIT1-F              | GAGCCCAGGCAGACTCAAAAT    |
| OE-SLIT1-R              | AAGTCCCCACAGCAAACCAAT    |
| miR-640 inhibitor       | AGAGGCAGGUUCCUGGAUCAU    |
| miR-640 mimic-sense     | AUGAUCCAGGAACCUGCCUCU    |
| miR-640-mimic-antisense | AGAGGCAGGUUCCUGGAUCAU    |
| Mimic-NC                | UCACAACCUCCUAGAAAGAGUAGA |
| Inhibitor-NC            | UUGUACUACACAAAAGUACUG    |

OE, overexpression vector; SLIT1, Slit guidance ligand 1; F, forward; R, reverse; miR, microRNA; NC, negative control.
